# Supplementary material for: earlyMYCO: A Pilot Mother-Child Cohort Study to Assess Early-Life Exposure to Mycotoxins—Challenges and Lessons Learned
Source: MDPI journal article supplement (doi:10.3390/ijerph19137716), 2022-06-23
Supplement: s1 [file s1]

**Supplementary Material of the manuscript: earlyMYCO – a pilot mother-child cohort study to assess ear-ly-life exposure to mycotoxins**

**Table S1.** Main characteristics of published studies considered for designing the earlyMYCO pilot study.

| Reference              | Study design    | Participants         | Moments of observation                                                                             | Data collection                                                                                                                                                                         | Biological samples                                                    | Analysis of environmental contaminants (Yes/No) |
|------------------------|-----------------|----------------------|----------------------------------------------------------------------------------------------------|-----------------------------------------------------------------------------------------------------------------------------------------------------------------------------------------|-----------------------------------------------------------------------|-------------------------------------------------|
| Galvano et al. (2008)  | Cross-sectional | Women                | Day 30 after birth                                                                                 | dietary questionnaire                                                                                                                                                                   | Breast milk                                                           | Yes                                             |
| Wright et al. (2013)   | Cohort          | Parents and children | 26-28 weeks gestation<br>6, 12 and 18 months and 2, 3 and 4 years, after birth                     | sociodemographic, ethnicity and family trees, lifestyle factors, anthropometric measures, health data                                                                                   | Mother: blood, urine<br>Father: saliva<br>Children: cord blood, blood | Yes                                             |
| Arbuckle et al. (2013) | Cohort          | Women and children   | Gestation: 6-13 weeks, 16-21 weeks, 32-34 weeks<br>Delivery<br>1-2 days and 2-10 weeks after birth | Sociodemographic, lifestyle (e.g., smoking and alcohol), medical history, use of natural health products and medications, and potential sources of exposure data, dietary questionnaire | Mother: blood, urine, breast milk<br>Children: cord blood, meconium   | Yes                                             |

|                     |                 |                      |                                                                                                                            |                                                                                                                                                                                                                                                                                             |                                                                                                               |     |
|---------------------|-----------------|----------------------|----------------------------------------------------------------------------------------------------------------------------|---------------------------------------------------------------------------------------------------------------------------------------------------------------------------------------------------------------------------------------------------------------------------------------------|---------------------------------------------------------------------------------------------------------------|-----|
| Heude et al. (2016) | Cohort          | Parents and children | Mothers: 24-28 weeks gestation, delivery, 5-6 weeks after delivery<br>Children: birth, 1 year, 3 years, 5-6 years, 8 years | Health (e.g., anthropometric measures, blood pressure, infectious disease, mental health) Exposures (e.g., smoking, alcohol consumption, dietary behaviour, outdoor air pollution, indoor contaminants)<br>Behaviour and cognitive development (IQ, behaviour, other cognitive assessments) | Mother: blood, urine, hair, saliva, colostrum<br>Father: blood<br>Children: cord blood, meconium, hair, urine | Yes |
| Smith et al. (2017) | Cross-sectional | Women                | Gestation: 14 weeks                                                                                                        | demographics, dietary practices, childcare behaviours                                                                                                                                                                                                                                       | Urine                                                                                                         | Yes |

---

**Table S2.** Optimized MRM parameters for mycotoxins biomarkers (n = 18) and internal standards (n = 3) in urine and breastmilk.

| Analyte                                        | Rt    | Q1                  | CV  | Q3                    | CE    | Dwell time | ESI-source |
|------------------------------------------------|-------|---------------------|-----|-----------------------|-------|------------|------------|
|                                                | (min) | (mz <sup>-1</sup> ) | (v) | (mz <sup>-1</sup> )   | (v)   | (msec)     |            |
| AFB <sub>1</sub>                               | 6.93  | 313                 | 65  | 241 <sup>a</sup> /285 | 32/20 | 0.191      | +          |
| AFB <sub>2</sub>                               | 6.64  | 315                 | 25  | 259 <sup>a</sup> /287 | 28/24 | 0.117      | +          |
| AFG <sub>1</sub>                               | 6.28  | 329                 | 50  | 243 <sup>a</sup> /311 | 24/20 | 0.117      | +          |
| AFG <sub>2</sub>                               | 5.96  | 331                 | 40  | 313 <sup>a</sup> /285 | 24/28 | 0.117      | +          |
| AFM <sub>1</sub>                               | 6.02  | 329                 | 30  | 273 <sup>a</sup> /259 | 22/25 | 0.117      | +          |
| OT- $\alpha$                                   | 5.91  | 257                 | 30  | 239 <sup>a</sup> /221 | 10/20 | 0.117      | +          |
| DON                                            | 3.25  | 297                 | 30  | 175 <sup>a</sup> /189 | 20/15 | 0.219      | +          |
| aZEL                                           | 9.33  | 321                 | 30  | 175 <sup>a</sup> /177 | 22/17 | 0.119      | +          |
| bZEL                                           | 8.53  | 321                 | 30  | 175 <sup>a</sup> /177 | 22/16 | 0.218      | +          |
| FB <sub>1</sub>                                | 8.28  | 722                 | 40  | 352 <sup>a</sup> /344 | 32/36 | 0.218      | +          |
| FB <sub>2</sub>                                | 9.28  | 706                 | 70  | 336 <sup>a</sup> /354 | 36/30 | 0.119      | +          |
| FB <sub>3</sub>                                | 10.37 | 706                 | 70  | 354 <sup>a</sup> /530 | 30/28 | 0.608      | +          |
| NIV                                            | 2.30  | 313                 | 35  | 175 <sup>a</sup> /177 | 21/16 | 0.219      | +          |
| ZEN                                            | 9.67  | 319                 | 40  | 283 <sup>a</sup> /301 | 12/10 | 0.119      | +          |
| OTA                                            | 9.36  | 404                 | 40  | 239 <sup>a</sup> /358 | 22/12 | 0.119      | +          |
| HFB <sub>1</sub>                               | 7.95  | 406                 | 40  | 334 <sup>a</sup> /236 | 19/19 | 0.086      | +          |
| AFL                                            | 7.70  | 297                 | 45  | 269 <sup>a</sup> /226 | 20/25 | 0.032      | +          |
| STE                                            | 10.13 | 325                 | 40  | 281 <sup>a</sup> /310 | 24/30 | 0.049      | +          |
| <sup>13</sup> C <sub>15</sub> DON              | 3.25  | 312                 | 30  | 245 <sup>a</sup> /103 | 10/10 | 0.219      | +          |
| <sup>13</sup> C <sub>17</sub> AFB <sub>1</sub> | 6.93  | 330                 | 40  | 301 <sup>a</sup> /285 | 22/26 | 0.191      | +          |
| <sup>13</sup> C <sub>20</sub> OTA              | 9.36  | 424                 | 40  | 232 <sup>a</sup> /230 | 30/20 | 0.119      | +          |

Rt = retention time. Q1 = parent ion. CV = cone voltage. Q3 = daughters ions. CE = collision energy. AFB<sub>1</sub> = aflatoxin B<sub>1</sub>; AFB<sub>2</sub> = aflatoxin B<sub>2</sub>; AFG<sub>1</sub> = Aflatoxin G<sub>1</sub>; AFG<sub>2</sub> = aflatoxin G<sub>2</sub>; AFM<sub>1</sub> = aflatoxin M<sub>1</sub>; OT- $\alpha$  = Ochratoxine alpha; DON = deoxynivalenol; aZEL = alpha-zearalenol; bZEL = beta-zearalenol; FB<sub>1</sub> = fumonisin B<sub>1</sub>; FB<sub>2</sub> = fumonisin B<sub>2</sub>; FB<sub>3</sub> = fumonisin B<sub>3</sub>; NIV = nivalenol; ZEN = zearalenone; OTA = ochratoxine A; HFB<sub>1</sub> = hydrolyzed fumonisin B<sub>1</sub>; AFL = aflatoxicol; STE = sterigmatocystin; <sup>13</sup>C<sub>15</sub>-DON = isotope-labelled (<sup>13</sup>C<sub>15</sub>) deoxynivalenol; <sup>13</sup>C<sub>17</sub>-AFB<sub>1</sub> = isotope-labelled (<sup>13</sup>C<sub>17</sub>) aflatoxin B<sub>1</sub>; <sup>13</sup>C<sub>20</sub>-OTA = isotope-labelled (<sup>13</sup>C<sub>20</sub>) ochratoxin A. <sup>a</sup> Quantifier transition.

**Table S3.** Performance characteristics of the analytical LC-MS/MS method for urine samples.

| Analyte          | Calibration range | R <sup>2</sup> | LOD     | LOQ     | Apparent Recovery | RSD <sub>r</sub> | RSD <sub>R</sub> | U     |
|------------------|-------------------|----------------|---------|---------|-------------------|------------------|------------------|-------|
|                  | (ng/mL)           |                | (ng/mL) | (ng/mL) | (%)               | (%)              | (%)              | (%)   |
| AFB <sub>1</sub> | 0.25-16.00        | 0.9731         | 1.19    | 2.38    | 90.88             | 14.09            | 15.84            | 20.88 |
| AFB <sub>2</sub> | 0.25-16.00        | 0.9944         | 1.01    | 2.03    | 98.60             | 4.98             | 10.85            | 19.00 |
| AFG <sub>1</sub> | 0.25-16.00        | 0.9752         | 2.08    | 4.16    | 105.90            | 11.48            | 13.72            | 16.10 |
| AFG <sub>2</sub> | 0.25-16.00        | 0.9505         | 1.32    | 2.65    | 95.08             | 10.77            | 15.40            | 19.89 |
| AFM <sub>1</sub> | 0.25-16.00        | 0.9524         | 0.38    | 0.77    | 94.26             | 11.95            | 12.76            | 17.02 |
| OT- $\alpha$     | 0.25-16.00        | 0.9703         | 1.18    | 2.37    | 103.70            | 4.99             | 4.86             | 11.87 |
| DON              | 2.50-160.00       | 0.9930         | 5.77    | 11.53   | 100.40            | 4.74             | 6.39             | 15.57 |
| aZEL             | 2.50-160.00       | 0.9842         | 9.76    | 26.91   | 100.86            | 7.55             | 8.64             | 18.96 |
| bZEL             | 2.50-160.00       | 0.9737         | 12.43   | 24.87   | 81.87             | 2.25             | 1.60             | 7.70  |
| FB <sub>1</sub>  | 2.50-160.00       | 0.9697         | 23.19   | 46.39   | 98.51             | 3.04             | 8.29             | 10.23 |
| FB <sub>2</sub>  | 2.50-160.00       | 0.9989         | 7.61    | 15.22   | 98.30             | 7.35             | 7.85             | 9.40  |
| FB <sub>3</sub>  | 3.00-192.00       | 0.9922         | 7.75    | 15.49   | 93.93             | 6.11             | 9.03             | 9.56  |
| NIV              | 2.50-160.00       | 0.9870         | 10.20   | 20.40   | 91.93             | 9.06             | 17.46            | 22.33 |
| ZEN              | 2.50-160.00       | 0.9947         | 5.56    | 11.11   | 92.47             | 4.10             | 6.98             | 18.54 |
| OTA              | 0.25-16.00        | 0.9972         | 0.73    | 1.43    | 102.16            | 2.75             | 2.61             | 11.54 |

LOD = Limit of detection. LOQ = Limit of quantification. RSD<sub>r</sub> = relative standard deviation intra-day precision. RSD<sub>R</sub> = relative standard deviation inter-day precision. U = measurement uncertainty. AFB<sub>1</sub> = aflatoxin B<sub>1</sub>; AFB<sub>2</sub> = aflatoxin B<sub>2</sub>; AFG<sub>1</sub> = Aflatoxin G<sub>1</sub>; AFG<sub>2</sub> = aflatoxin G<sub>2</sub>; AFM<sub>1</sub> = aflatoxin M<sub>1</sub>; OT- $\alpha$  = Ochratoxin alpha; DON = deoxynivalenol; aZEL = alpha-zearalenol; bZEL = beta-zearalenol; FB<sub>1</sub> = fumonisin B<sub>1</sub>; FB<sub>2</sub> = fumonisin B<sub>2</sub>; FB<sub>3</sub> = fumonisin B<sub>3</sub>; NIV = nivalenol; ZEN = zearalenone; OTA = ochratoxin A.

**Table S4.** Performance characteristics of the analytical LC-MS/MS method for breastmilk samples.

| Analyte          | Calibration range<br>(ng/mL) | R <sup>2</sup> | LOD<br>(ng/mL) | LOQ<br>(ng/mL) | Apparent Recovery<br>(%) | RSD <sub>r</sub><br>(%) | RSD <sub>R</sub><br>(%) | U<br>(%) |
|------------------|------------------------------|----------------|----------------|----------------|--------------------------|-------------------------|-------------------------|----------|
| AFB <sub>1</sub> | 0.125-8.00                   | 0.9998         | 0.20           | 0.39           | 95.33                    | 3.26                    | 1.28                    | 12.86    |
| AFB <sub>2</sub> | 0.125-8.00                   | 0.9919         | 0.37           | 0.75           | 91.00                    | 4.88                    | 7.71                    | 13.26    |
| AFG <sub>1</sub> | 0.125-8.00                   | 0.9990         | 0.31           | 0.62           | 96.00                    | 0.71                    | 3.80                    | 9.87     |
| AFG <sub>2</sub> | 0.125-8.00                   | 0.9996         | 0.23           | 0.46           | 91.67                    | 8.23                    | 6.66                    | 19.48    |
| AFM <sub>1</sub> | 0.125-8.00                   | 0.9990         | 0.38           | 0.77           | 90.67                    | 4.37                    | 15.35                   | 12.86    |
| OT- $\alpha$     | 0.125-8.00                   | 0.9987         | 0.47           | 0.95           | 100.67                   | 2.56                    | 0.92                    | 7.57     |
| DON              | 1.25-80.00                   | 0.9930         | 3.01           | 6.02           | 100.20                   | 6.43                    | 0.13                    | 17.30    |
| aZEL             | 1.25-80.00                   | 0.9920         | 3.00           | 6.00           | 115.33                   | 5.12                    | 4.13                    | 15.61    |
| bZEL             | 1.25-80.00                   | 0.9958         | 2.70           | 5.40           | 118.43                   | 3.63                    | 3.01                    | 14.52    |
| FB <sub>1</sub>  | 1.25-80.00                   | 0.9989         | 3.40           | 6.80           | 98.63                    | 2.13                    | 4.75                    | 12.79    |
| FB <sub>2</sub>  | 1.25-80.00                   | 0.9998         | 1.99           | 3.98           | 115.53                   | 1.33                    | 0.34                    | 3.86     |
| FB <sub>3</sub>  | 1.50-96.00                   | 0.9997         | 2.38           | 4.76           | 114.97                   | 5.53                    | 1.68                    | 12.10    |
| NIV              | 1.25-80.00                   | 0.9954         | 2.78           | 5.57           | 88.27                    | 5.07                    | 5.36                    | 17.63    |
| ZEN              | 1.25-80.00                   | 0.9981         | 2.19           | 4.38           | 110.4                    | 1.15                    | 0.71                    | 13.66    |
| OTA              | 0.125-8.00                   | 0.9987         | 0.66           | 1.32           | 118.00                   | 5.71                    | 0.71                    | 11.31    |
| HFB <sub>1</sub> | 0.625-40.00                  | 0.9972         | 2.42           | 4.85           | 86.67                    | 5.81                    | 2.85                    | 18.48    |
| AFL              | 0.125-8.00                   | 0.9945         | 0.27           | 0.55           | 95.67                    | 12.86                   | 6.15                    | 18.48    |
| STE              | 0.125-8.00                   | 0.9941         | 0.77           | 1.54           | 108.67                   | 5.66                    | 2.77                    | 18.46    |

LOD = Limit of detection. LOQ = Limit of quantification. RSD<sub>r</sub> = relative standard deviation intra-day precision. RSD<sub>R</sub> = relative standard deviation inter-day precision. U = measurement uncertainty. AFB<sub>1</sub> = aflatoxin B<sub>1</sub>; AFB<sub>2</sub> = aflatoxin B<sub>2</sub>; AFG<sub>1</sub> = Aflatoxin G<sub>1</sub>; AFG<sub>2</sub> = aflatoxin G<sub>2</sub>; AFM<sub>1</sub> = aflatoxin M<sub>1</sub>; OT- $\alpha$  = Ochratoxin alpha; DON = deoxynivalenol; aZEL = alpha-zearalenol; bZEL = beta-zearalenol; FB<sub>1</sub> = fumonisin B<sub>1</sub>; FB<sub>2</sub> = fumonisin B<sub>2</sub>; FB<sub>3</sub> = fumonisin B<sub>3</sub>; NIV = nivalenol; ZEN = zearalenone; OTA = ochratoxin A; HFB<sub>1</sub> = hydrolyzed fumonisin B<sub>1</sub>; AFL = aflatoxinol; STE = sterigmatocystin.

**Table S5.** Questionnaires and biological samples (n) collected under the earlyMYCO pilot study.

| Participant               |        | 24-28 weeks pregnancy |                |                   | 1 <sup>st</sup> month |                |                   | 6 <sup>th</sup> month |                |                   |
|---------------------------|--------|-----------------------|----------------|-------------------|-----------------------|----------------|-------------------|-----------------------|----------------|-------------------|
|                           |        | Interview based       |                |                   | Self-report based     |                |                   |                       |                |                   |
|                           |        | Participants<br>(n)   | Missing<br>(n) | Incomplete<br>(n) | Participants<br>(n)   | Missing<br>(n) | Incomplete<br>(n) | Participants<br>(n)   | Missing<br>(n) | Incomplete<br>(n) |
| <b>Questionnaires</b>     |        |                       |                |                   |                       |                |                   |                       |                |                   |
| Sociodemographic          | Mother | 19                    | 0              | 0                 | Nc                    | Nc             | Nc                | Nc                    | Nc             | Nc                |
|                           | Child  | Nc                    | Nc             | Nc                | Nc                    | Nc             | Nc                | Nc                    | Nc             | Nc                |
| Food Frequency            | Mother | 19                    | 0              | 0                 | Nc                    | Nc             | Nc                | Nc                    | Nc             | Nc                |
|                           | Child  | Nc                    | Nc             | Nc                | Nc                    | Nc             | Nc                | Nc                    | Nc             | Nc                |
| 24h Dietary Recall        | Mother | 19                    | 0              | 0                 | 9                     | 0              | 0                 | 8                     | 3              | 1                 |
|                           | Child  | Nc                    | Nc             | Nc                | 9                     | 0              | 0                 | 8                     | 3              | 1                 |
| <b>Biological Samples</b> |        |                       |                |                   |                       |                |                   |                       |                |                   |
| Spot Urine                | Mother | 19                    | 0              | 0                 | 9                     | 0              | NA                | 8                     | 1              | NA                |
|                           | Child  | Nc                    | Nc             | Nc                | 9                     | 0              | NA                | 8                     | 1              | NA                |
| Blood                     | Mother | 18                    | 1              | NA                | Nc                    | Nc             | Nc                | Nc                    | Nc             | Nc                |
|                           | Child  | Nc                    | Nc             | Nc                | Nc                    | Nc             | Nc                | Nc                    | Nc             | Nc                |
| Breast milk               | Mother | Nc                    | Nc             | Nc                | 9 (7+2*)              | 0              | NA                | 8 (4+2*)              | 2              | NA                |
|                           | Child  | Nc                    | Nc             | Nc                | Nc                    | Nc             | Nc                | Nc                    | Nc             | Nc                |

Nc = No considered for this moment of observation; NA = Not applicable; \*two children were fed with infant formula
